# Supplementary material for: Regression-Based Normative Data for Independent and Cognitively Active Spanish Older Adults: Free and Cued Selective Reminding Test, Rey–Osterrieth Complex Figure Test and Judgement of Line Orientation
Source: MDPI journal article supplement (doi:10.3390/ijerph182412977), 2021-12-09
Supplement: s1 [file s1]

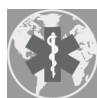

Supplementary Material

# Regression-Based Normative Data for Independent and Cognitively Active Spanish Older Adults: Free and Cued Selective Reminding Test, Rey-Osterrieth Complex Figure Test and Judgement of Line Orientation

Eva Calderón-Rubio <sup>1</sup>, Javier Oltra-Cucarella <sup>1,2,\*</sup>, Beatriz Bonete-López <sup>1,2</sup>, Clara Iñesta <sup>1</sup> and Esther Sitges-Maciá <sup>1,2</sup>

**Table S1.** Comparing number of low scores on FCSRT-Imm between normative data sets (NEURONORMA and SABIEX).

|            |    | SABIEX |    |       |
|------------|----|--------|----|-------|
|            |    | 0      | 1+ | Total |
| NEURONORMA | 0  | 94     | 7  | 101   |
|            | 1+ | 0      | 2  | 2     |
| Total      |    | 94     | 9  | 103   |

FCSRT-Imm: Free and Cued Selective Reminding Test, immediate recall.

**Table S2.** Comparing number of low scores on FCSRT-Del between normative data sets (NEURONORMA and SABIEX<sub>INDEP</sub>).

|            |    | SABIEX |    |       |
|------------|----|--------|----|-------|
|            |    | 0      | 1+ | Total |
| NEURONORMA | 0  | 91     | 11 | 102   |
|            | 1+ | 0      | 1  | 1     |
| Total      |    | 91     | 12 | 103   |

FCSRT-Del: Free and Cued Selective Reminding Test, delayed recall.

**Table S3.** Comparing number of low scores on FCSRT-Del independent (NEURONORMA) with FCSRT-Del conditional on FCSRT-Imm (FCSRT-Del<sub>SABIEX</sub>).

|            |    | SABIEX |    |       |
|------------|----|--------|----|-------|
|            |    | 0      | 1+ | Total |
| NEURONORMA | 0  | 91     | 11 | 102   |
|            | 1+ | 0      | 1  | 1     |
| Total      |    | 91     | 12 | 103   |

FCSRT-Del: Free and Cued Selective Reminding Test, delayed recall.

**Table S4.** Comparing number of low scores on ROCF-Imm between normative data sets (NEURONORMA and SABIEX<sub>INDEP</sub>).

|            |    | SABIEX |    |       |
|------------|----|--------|----|-------|
|            |    | 0      | 1+ | Total |
| NEURONORMA | 0  | 91     | 5  | 96    |
|            | 1+ | 1      | 6  | 7     |
| Total      |    | 92     | 11 | 103   |

ROCF-Imm: Rey-Osterrieth Complex Figure, immediate recall.

**Table S5.** Comparing number of low scores on ROCF-Imm independent (NEURONORMA) with ROCF-Imm conditional on ROCF-C (ROCF-Imm<sub>SABIEX</sub>).

|            |    | SABIEX |    |       |
|------------|----|--------|----|-------|
|            |    | 0      | 1+ | Total |
| NEURONORMA | 0  | 91     | 5  | 96    |
|            | 1+ | 3      | 4  | 7     |
| Total      |    | 94     | 9  | 103   |

ROCF-Imm: Rey-Osterrieth Complex Figure, immediate recall; ROCF-C: Rey-Osterrieth Complex Figure, copy trial.

**Table S6.** Comparing number of low scores on ROCF-Del between normative data sets (NEURONORMA and SABIEX<sub>INDEP</sub>).

|            |    | SABIEX |    |       |
|------------|----|--------|----|-------|
|            |    | 0      | 1+ | Total |
| NEURONORMA | 0  | 89     | 4  | 93    |
|            | 1+ | 1      | 9  | 10    |
| Total      |    | 90     | 13 | 103   |

ROCF-Del: Rey-Osterrieth Complex Figure, delayed recall.

**Table S7.** Comparing number of low scores on ROCF-Del independent (NEURONORMA) with ROCF-Del conditional on ROCF-Imm (ROCF-Del<sub>SABIEX</sub>).

|            |    | SABIEX |    |       |
|------------|----|--------|----|-------|
|            |    | 0      | 1+ | Total |
| NEURONORMA | 0  | 82     | 11 | 93    |
|            | 1+ | 10     | 0  | 10    |
| Total      |    | 92     | 11 | 103   |

ROCF-Del: Rey-Osterrieth Complex Figure, delayed recall; ROCF-Imm: Rey-Osterrieth Complex Figure, immediate recall.
